# Supplementary material for: Metabolism and DNA Adduct Formation of Tobacco-Specific N-Nitrosamines
Source: MDPI journal article supplement (doi:10.3390/ijms23095109), 2022-05-04
Supplement: s1 [file s1]

## Supplementary Information

### Metabolism and DNA Adduct Formation of Tobacco-specific *N*-Nitrosamines

Yupeng Li <sup>a,b,\*</sup> and Stephen S. Hecht <sup>a</sup>

<sup>a</sup> Masonic Cancer Center and <sup>b</sup> Department of Medicinal Chemistry, University of Minnesota, Minneapolis, Minnesota 55455, United States.

\* E-mail: lixx4803@umn.edu; Tel.: (612) 624-8187; Cancer and Cardiovascular Research Building 2-128, 2231 6th Street SE, Minneapolis, Minnesota 55455, United States.

#### Table of Contents:

**Table S1.** Levels of representative POB, PHB and methyl DNA adducts in the tissues of laboratory animals exposed to NNK or (*S*)-NNAL or (*R*)-NNAL.

**Table S2:** Levels of representative POB and methyl DNA adducts in the tissues of male F344 rats exposed to NNN or its enantiomers in the drinking water.

**Table S1.** Levels of representative POB, PHB and methyl DNA adducts in the tissues of laboratory animals exposed to NNK or (S)-NNAL or (R)-NNAL.

| POB, PHB, and methyl DNA base and phosphate adducts (fmol/mg DNA unless noted otherwise) formed by NNK and NNAL |                             |                                                        |                    |                          |                          |                          |                          |                         |                         |                                 |                          |                          |                         |                         |                                 |                        |  |                                    |      |
|-----------------------------------------------------------------------------------------------------------------|-----------------------------|--------------------------------------------------------|--------------------|--------------------------|--------------------------|--------------------------|--------------------------|-------------------------|-------------------------|---------------------------------|--------------------------|--------------------------|-------------------------|-------------------------|---------------------------------|------------------------|--|------------------------------------|------|
| Animal species                                                                                                  | Administration pathway      | Exposure amount                                        | Exposure time      | Target tissue            |                          |                          |                          |                         |                         |                                 |                          |                          |                         |                         |                                 |                        |  | Total methyl DNA phosphate adducts | Ref. |
|                                                                                                                 |                             |                                                        |                    |                          | N <sup>6</sup> -POB-dAdo | O <sup>2</sup> -POB-Cyt  | O <sup>6</sup> -POB-dGuo | N <sup>7</sup> -POB-Gua | O <sup>2</sup> -POB-Thd | Total POB DNA phosphate adducts | N <sup>6</sup> -PHB-dAdo | O <sup>6</sup> -PHB-dGuo | N <sup>7</sup> -PHB-Gua | O <sup>2</sup> -PHB-Thd | Total PHB DNA phosphate adducts | O <sup>6</sup> -Me-Gua |  |                                    |      |
| Female A/J mice                                                                                                 | Single i.p. injection       | 10 μmol NNK in saline                                  | 8 h                | Lung                     |                          | 0.2 ± 0.1 pmol/μmol dG   | 1.0 ± 0.5 pmol/μmol dG   | 4.2 ± 1.0 pmol/μmol dG  | 2.8 ± 0.5 pmol/μmol dG  |                                 |                          |                          |                         |                         |                                 |                        |  | [1]                                |      |
|                                                                                                                 |                             |                                                        | 48 h               |                          |                          | 0.09 ± 0.04 pmol/μmol dG | 0.7 ± 0.4 pmol/μmol dG   | 3.0 ± 0.3 pmol/μmol dG  | 2.7 ± 0.4 pmol/μmol dG  |                                 |                          |                          |                         |                         |                                 |                        |  |                                    |      |
|                                                                                                                 |                             |                                                        | 96 h               |                          |                          | 0.06 ± 0.04 pmol/μmol dG | 0.7 ± 0.2 pmol/μmol dG   | 3.6 ± 1.8 pmol/μmol dG  | 3.0 ± 0.9 pmol/μmol dG  |                                 |                          |                          |                         |                         |                                 |                        |  |                                    |      |
| Male F344 rats                                                                                                  | Once daily s.c. injection   | 5.2 mg (0.025 mmol)NNK/kg body weight (low dose group) | 4 consecutive days | Liver                    |                          | 4400 ± 781               | 42 ± 26                  | 5330 ± 969              | 5300 ± 1088             |                                 |                          |                          |                         |                         |                                 |                        |  | [2]                                |      |
|                                                                                                                 |                             | Lung                                                   |                    |                          | 724 ± 54                 | 376 ± 39                 | 1400 ± 133               | 1680 ± 99               |                         |                                 |                          |                          |                         |                         |                                 |                        |  |                                    |      |
|                                                                                                                 |                             | Liver                                                  |                    |                          | 11700 ± 2517             | 210 ± 38                 | 18300 ± 2407             | 18400 ± 2536            |                         |                                 |                          |                          |                         |                         |                                 |                        |  |                                    |      |
|                                                                                                                 |                             | Lung                                                   |                    |                          | 1260 ± 253               | 730 ± 151                | 2710 ± 717               | 3030 ± 724              |                         |                                 |                          |                          |                         |                         |                                 |                        |  |                                    |      |
|                                                                                                                 | Dosed in the drinking water | 10 ppm NNK                                             | 20 weeks           | Liver                    |                          | 490 ± 146                | ND                       | 730 ± 225               | 2680 ± 643              |                                 |                          | ND                       | ND                      | 454 ± 554               |                                 | 891 ± 379              |  | [3-6]                              |      |
|                                                                                                                 |                             |                                                        |                    | Lung                     |                          | 940 ± 175                | 20 ± 5                   | 1060 ± 169              | 5070 ± 1057             |                                 |                          | 15 ± 1.9                 | 147 ± 33                | 322 ± 95                |                                 | 1910 ± 615             |  |                                    |      |
|                                                                                                                 |                             |                                                        |                    | Nasal olfactory mucosa   |                          | ND                       | ND                       | 63.9 ± 20.3             | 295 ± 22                |                                 |                          | 20.4 ± 2.4               | 83.0 ± 26.2             | 357 ± 312               |                                 |                        |  |                                    |      |
|                                                                                                                 |                             |                                                        |                    | Nasal respiratory mucosa |                          | 24.7 ± 29.0              | 36.3 ± 32.5              | 433 ± 267               | 1617 ± 831              |                                 |                          | 285 ± 1                  | 517 ± 109               | 1715 ± 1155             |                                 |                        |  |                                    |      |
|                                                                                                                 |                             |                                                        |                    | Oral mucosa              |                          | ND                       | ND                       | 51.3 ± 14.9             | 326 ± 74                |                                 |                          | ND                       | ND                      | 139 ± 197               |                                 |                        |  |                                    |      |
|                                                                                                                 |                             |                                                        |                    | Pancreas                 |                          | ND                       | ND                       | 26.7 ± 6.7              | 130 ± 15                |                                 |                          | ND                       | 13.6 ± 12.0             | 113 ± 10                |                                 |                        |  |                                    |      |
|                                                                                                                 |                             | 10 ppm (S)-NNAL                                        | 20 weeks           | Liver                    |                          | 360 ± 47                 | ND                       | 470 ± 86                | 1910 ± 243              |                                 |                          | ND                       | ND                      | 140 ± 13                |                                 |                        |  |                                    |      |
|                                                                                                                 |                             |                                                        |                    | Lung                     |                          | 1020 ± 73                | 20 ± 2                   | 1110 ± 75               | 4980 ± 65               |                                 |                          | 16 ± 3.8                 | 159 ± 56                | 394 ± 86                |                                 |                        |  |                                    |      |
|                                                                                                                 |                             |                                                        |                    | Nasal olfactory mucosa   |                          | ND                       | ND                       | 47.8 ± 3.1              | 235 ± 30                |                                 |                          | 13.0 ± 0.3               | 47.5 ± 2.5              | 260 ± 248               |                                 |                        |  |                                    |      |
|                                                                                                                 |                             |                                                        |                    | Nasal respiratory mucosa |                          | 33.4 ± 17.6              | 41.1 ± 27.7              | 377 ± 172               | 1451 ± 581              |                                 |                          | 272 ± 9                  | 454 ± 85                | 1401 ± 913              |                                 |                        |  |                                    |      |
|                                                                                                                 |                             |                                                        |                    | Oral mucosa              |                          | ND                       | ND                       | 27.8 ± 24.1             | 227 ± 24                |                                 |                          | ND                       | ND                      | ND                      |                                 |                        |  |                                    |      |
| Pancreas                                                                                                        |                             |                                                        |                    | ND                       | ND                       | 26.4 ± 1.2               | 149 ± 26                 |                         |                         | ND                              | ND                       | 90.9 ± 4.6               |                         |                         |                                 |                        |  |                                    |      |
| 10 ppm (R)-NNAL                                                                                                 | 20 weeks                    | Liver                                                  |                    | 0                        | ND                       | 40 ± 5                   | 200 ± 47                 |                         |                         | ND                              | 757 ± 423                | 1570 ± 846               |                         |                         |                                 |                        |  |                                    |      |
|                                                                                                                 |                             | Lung                                                   |                    | 60 ± 10                  | 0                        | 100 ± 11                 | 480 ± 18                 |                         |                         | 455 ± 123                       | 3770 ± 1020              | 8080 ± 1750              |                         |                         |                                 |                        |  |                                    |      |

| POB, PHB, and methyl DNA base and phosphate adducts (fmol/mg DNA unless noted otherwise) formed by NNK and NNAL |                             |                 |               |                          |                                 |                                |                                 |                                |                                |                                 |                                 |                                 |                                |                                |                                 |                               |                                    |        |
|-----------------------------------------------------------------------------------------------------------------|-----------------------------|-----------------|---------------|--------------------------|---------------------------------|--------------------------------|---------------------------------|--------------------------------|--------------------------------|---------------------------------|---------------------------------|---------------------------------|--------------------------------|--------------------------------|---------------------------------|-------------------------------|------------------------------------|--------|
| Animal species                                                                                                  | Administration pathway      | Exposure amount | Exposure time | Target tissue            |                                 |                                |                                 |                                |                                |                                 |                                 |                                 |                                |                                |                                 |                               |                                    | Ref.   |
|                                                                                                                 |                             |                 |               |                          | <i>N</i> <sup>6</sup> -POB-dAdo | <i>O</i> <sup>2</sup> -POB-Cyt | <i>O</i> <sup>6</sup> -POB-dGuo | <i>N</i> <sup>7</sup> -POB-Gua | <i>O</i> <sup>2</sup> -POB-Thd | Total POB DNA phosphate adducts | <i>N</i> <sup>6</sup> -PHB-dAdo | <i>O</i> <sup>6</sup> -PHB-dGuo | <i>N</i> <sup>7</sup> -PHB-Gua | <i>O</i> <sup>2</sup> -PHB-Thd | Total PHB DNA phosphate adducts | <i>O</i> <sup>6</sup> -Me-Gua | Total methyl DNA phosphate adducts |        |
|                                                                                                                 |                             |                 |               | Nasal olfactory mucosa   |                                 | ND                             | ND                              | 5.4 ± 0.2                      | 33.3 ± 4.0                     |                                 |                                 | 23.0 ± 4.0                      | 439 ± 81                       | 1373 ± 880                     |                                 |                               |                                    | [7-12] |
|                                                                                                                 |                             |                 |               | Nasal respiratory mucosa |                                 | ND                             | ND                              | 42.7 ± 13.5                    | 195 ± 44                       |                                 |                                 | 306 ± 18                        | 3300 ± 446                     | 9014 ± 7497                    |                                 |                               |                                    |        |
|                                                                                                                 |                             |                 |               | Oral mucosa              |                                 | ND                             | ND                              | ND                             | 3.8 ± 6.6                      |                                 |                                 | ND                              | 189 ± 49                       | 844 ± 585                      |                                 |                               |                                    |        |
|                                                                                                                 |                             |                 |               | pancreas                 |                                 | ND                             | ND                              | ND                             | 11.4 ± 2.4                     |                                 |                                 | 4.1 ± 1.1                       | 73.0 ± 17.7                    | 475 ± 73                       |                                 |                               |                                    |        |
|                                                                                                                 | Dosed in the drinking water | 5 ppm NNK       | 10 weeks      | Liver                    |                                 |                                | ND                              | 501 ± 53                       | 1808 ± 840                     | 190 ± 49                        |                                 | ND                              | 335 ± 40                       | 390 ± 185                      | 2140 ± 131                      |                               |                                    |        |
|                                                                                                                 |                             |                 |               | Lung                     |                                 |                                | 34 ± 21                         | 970 ± 148                      | 3591 ± 414                     | 475 ± 95                        |                                 | ND                              | 235 ± 40                       | 968 ± 28                       | 6390 ± 457                      | 213 ± 27                      | 2290 ± 546                         |        |
|                                                                                                                 |                             |                 |               | Pancreas                 |                                 |                                | ND                              | 30 ± 8                         | 102 ± 8                        |                                 |                                 | ND                              | 105 ± 15                       | 51 ± 14                        |                                 | ND                            |                                    |        |
|                                                                                                                 |                             |                 | 30 weeks      | Liver                    |                                 |                                | ND                              | 331 ± 36                       | 2144 ± 26                      | 134 ± 64                        |                                 | ND                              | 313 ± 79                       | 737 ± 186                      | 1930 ± 81                       |                               |                                    |        |
|                                                                                                                 |                             |                 |               | Lung                     |                                 |                                | 9 ± 9                           | 751 ± 29                       | 4809 ± 193                     | 417 ± 43                        |                                 | ND                              | 164 ± 44                       | 1369 ± 94                      | 8160 ± 654                      | 100 ± 65                      | 4480 ± 119                         |        |
|                                                                                                                 |                             |                 |               | Pancreas                 |                                 |                                | ND                              | 27 ± 21                        | 134 ± 28                       |                                 |                                 | ND                              | 98 ± 16                        | 89 ± 9                         |                                 | ND                            |                                    |        |
|                                                                                                                 |                             |                 | 50 weeks      | Liver                    | 32 ± 9                          |                                | ND                              | 257 ± 32                       | 1531 ± 161                     | 120 ± 36                        | 6 ± 1                           | ND                              | 295 ± 42                       | 658 ± 107                      | 1630 ± 166                      |                               |                                    |        |
|                                                                                                                 |                             |                 |               | Lung                     | 99 ± 3                          |                                | 9 ± 2                           | 688 ± 65                       | 4409 ± 320                     | 346 ± 41                        | 35 ± 5                          | ND                              | 129 ± 34                       | 1259 ± 66                      | 4000 ± 291                      | 79 ± 15                       | 3820 ± 215                         |        |
|                                                                                                                 |                             |                 |               | Pancreas                 |                                 |                                | ND                              | 24 ± 5                         | 121 ± 18                       |                                 |                                 | ND                              | -                              | 76 ± 38                        |                                 | ND                            |                                    |        |
|                                                                                                                 |                             |                 | 70 weeks      | Liver                    |                                 |                                | ND                              | 230 ± 90                       | 910 ± 6                        | 89 ± 4                          |                                 | ND                              | 194 ± 32                       | 272 ± 86                       | 878 ± 210                       |                               |                                    |        |
|                                                                                                                 |                             |                 |               | Lung                     |                                 |                                | 4 ± 2                           | 315 ± 75                       | 1983 ± 467                     | 218 ± 15                        |                                 | ND                              | 62 ± 15                        | 807 ± 142                      | 3950 ± 223                      | 34                            | 4510 ± 129                         |        |
|                                                                                                                 |                             |                 |               | Pancreas                 |                                 |                                | ND                              | 19 ± 3                         | 109 ± 17                       |                                 |                                 | ND                              | 90                             | 54 ± 5                         |                                 | ND                            |                                    |        |
|                                                                                                                 |                             | 5 ppm (S)-NNAL  | 10 weeks      | Liver                    |                                 |                                |                                 |                                |                                |                                 |                                 |                                 |                                |                                |                                 |                               |                                    |        |
|                                                                                                                 |                             |                 |               | Lung                     |                                 |                                | 9 ± 5                           | 609 ± 143                      | 2564 ± 648                     | 4650 ± 356                      |                                 | ND                              | 138 ± 17                       | 709 ± 29                       | 3670 ± 67                       | 269 ± 178                     | 1120 ± 217                         |        |
|                                                                                                                 |                             |                 |               | Pancreas                 |                                 |                                | ND                              | 23 ± 9                         | 80 ± 8                         |                                 |                                 | ND                              | -                              | 43 ± 1                         |                                 | ND                            |                                    |        |
|                                                                                                                 |                             |                 | 30 weeks      | Liver                    |                                 |                                |                                 |                                |                                |                                 |                                 |                                 |                                |                                |                                 |                               |                                    |        |
|                                                                                                                 |                             |                 |               | Lung                     |                                 |                                | 10 ± 3                          | 624 ± 66                       | 3319 ± 365                     | 2910 ± 109                      |                                 | ND                              | 125 ± 14                       | 1083 ± 27                      | 4180 ± 119                      | 114 ± 25                      | 1020 ± 290                         |        |
|                                                                                                                 |                             |                 |               | Pancreas                 |                                 |                                | ND                              | 17 ± 4                         | 102 ± 11                       |                                 |                                 | ND                              | 74 ± 68                        | 75 ± 12                        |                                 | ND                            |                                    |        |
|                                                                                                                 |                             |                 | 50 weeks      | Liver                    | 27 ± 6                          |                                |                                 |                                |                                |                                 | 5 ± 1                           |                                 |                                |                                |                                 |                               |                                    |        |
|                                                                                                                 |                             |                 |               | Lung                     | 130 ± 1                         |                                | 10 ± 5                          | 568 ± 68                       | 3951 ± 328                     | 1310 ± 77                       | 36 ± 8                          | ND                              | 100 ± 25                       | 1152 ± 41                      | 3480 ± 79                       | 78 ± 29                       | 872 ± 309                          |        |
|                                                                                                                 |                             |                 |               | Pancreas                 |                                 |                                | ND                              | 22 ± 14                        | 98 ± 14                        |                                 |                                 | ND                              | 73                             | 64 ± 22                        |                                 | ND                            |                                    |        |
|                                                                                                                 |                             |                 | 70 weeks      | Liver                    |                                 |                                |                                 |                                |                                |                                 |                                 |                                 |                                |                                |                                 |                               |                                    |        |
|                                                                                                                 |                             |                 |               | Lung                     |                                 |                                | 4 ± 2                           | 512 ± 70                       | 3949 ± 256                     | 1180 ± 204                      |                                 | ND                              | 116 ± 28                       | 1155 ± 310                     | 3820 ± 582                      | 49 ± 22                       | 995 ± 258                          |        |
|                                                                                                                 |                             |                 |               | Pancreas                 |                                 |                                | ND                              | 25 ± 5                         | 101 ± 18                       |                                 |                                 | ND                              | 105                            | 51 ± 13                        |                                 | ND                            |                                    |        |
|                                                                                                                 |                             | 5 ppm (R)-NNAL  | 10 weeks      | Liver                    |                                 |                                |                                 |                                |                                |                                 |                                 |                                 |                                |                                |                                 |                               |                                    |        |

| Animal species | Administration pathway | Exposure amount | Exposure time | Target tissue | POB, PHB, and methyl DNA base and phosphate adducts (fmol/mg DNA unless noted otherwise) formed by NNK and NNAL |                                |                                 |                                |                                |                                 |                                 |                                 |                                |                                |                                 |                               |                                    | Ref. |
|----------------|------------------------|-----------------|---------------|---------------|-----------------------------------------------------------------------------------------------------------------|--------------------------------|---------------------------------|--------------------------------|--------------------------------|---------------------------------|---------------------------------|---------------------------------|--------------------------------|--------------------------------|---------------------------------|-------------------------------|------------------------------------|------|
|                |                        |                 |               |               | <i>N</i> <sup>6</sup> -POB-dAdo                                                                                 | <i>O</i> <sup>2</sup> -POB-Cyt | <i>O</i> <sup>6</sup> -POB-dGuo | <i>N</i> <sup>7</sup> -POB-Gua | <i>O</i> <sup>2</sup> -POB-Thd | Total POB DNA phosphate adducts | <i>N</i> <sup>6</sup> -PHB-dAdo | <i>O</i> <sup>6</sup> -PHB-dGuo | <i>N</i> <sup>7</sup> -PHB-Gua | <i>O</i> <sup>2</sup> -PHB-Thd | Total PHB DNA phosphate adducts | <i>O</i> <sup>6</sup> -Me-Gua | Total methyl DNA phosphate adducts |      |
|                |                        |                 |               |               |                                                                                                                 |                                |                                 |                                |                                |                                 |                                 |                                 |                                |                                |                                 |                               |                                    |      |
|                |                        |                 |               | Lung          |                                                                                                                 |                                | ND                              | 62 ± 19                        | 261 ± 31                       | 136 ± 32                        |                                 | ND                              | 869 ± 143                      | 4009 ± 707                     | 4530 ± 368                      | 5 ± 2                         | 874 ± 146                          |      |
|                |                        |                 |               | Pancreas      |                                                                                                                 |                                | ND                              | 4                              | 8 ± 2                          |                                 |                                 | ND                              | 159 ± 17                       | 181 ± 50                       |                                 | ND                            |                                    |      |
|                |                        |                 | 30 weeks      | Liver         |                                                                                                                 |                                |                                 |                                |                                |                                 |                                 |                                 |                                |                                |                                 |                               |                                    |      |
|                |                        |                 |               | Lung          |                                                                                                                 |                                | ND                              | 75 ± 24                        | 415 ± 77                       | 135 ± 30                        |                                 | ND                              | 861 ± 161                      | 6581 ± 481                     | 6670 ± 211                      | 17                            | 1430 ± 140                         |      |
|                |                        |                 |               | Pancreas      |                                                                                                                 |                                | ND                              | 3                              | 10 ± 1                         |                                 |                                 | ND                              | 172 ± 32                       | 431 ± 37                       |                                 | ND                            |                                    |      |
|                |                        |                 | 50 weeks      | Liver         | 4 ± 1                                                                                                           |                                |                                 |                                |                                |                                 | 24 ± 2                          |                                 |                                |                                |                                 |                               |                                    |      |
|                |                        |                 |               | Lung          | 16 ± 7                                                                                                          |                                | ND                              | 136 ± 10                       | 584 ± 45                       | 175 ± 17                        | 125 ± 34                        | ND                              | 379 ± 19                       | 6291 ± 885                     | 6280 ± 336                      | 7                             | 1100 ± 257                         |      |
|                |                        |                 |               | Pancreas      |                                                                                                                 |                                | ND                              | 3                              | 13 ± 1                         |                                 |                                 | ND                              | 124 ± 1                        | 369 ± 80                       |                                 | ND                            |                                    |      |
|                |                        |                 | 70 weeks      | Liver         |                                                                                                                 |                                |                                 |                                |                                |                                 |                                 |                                 |                                |                                |                                 |                               |                                    |      |
|                |                        |                 |               | Lung          |                                                                                                                 |                                | ND                              | 45 ± 16                        | 500 ± 111                      | 46                              |                                 | ND                              | 378 ± 105                      | 5792 ± 1763                    | 6920 ± 436                      | 4                             | 763 ± 90                           |      |
|                |                        |                 |               | Pancreas      |                                                                                                                 |                                | ND                              | 2                              | 18 ± 2                         |                                 |                                 | ND                              | 138 ± 36                       | 436 ± 99                       |                                 | ND                            |                                    |      |

**Table S2.** Levels of representative POB and methyl DNA adducts in the tissues of male F344 rats exposed to NNN or its enantiomers in the drinking water.

| Exposure amount | Exposure time | Target tissue            | DNA base and phosphate adducts (fmol/mg DNA) formed by NNN or its enantiomers |                          |                         |                         |                                 |          |                          | Ref.     |
|-----------------|---------------|--------------------------|-------------------------------------------------------------------------------|--------------------------|-------------------------|-------------------------|---------------------------------|----------|--------------------------|----------|
|                 |               |                          | O <sup>2</sup> -POB-Cyt                                                       | O <sup>6</sup> -POB-dGuo | N <sup>7</sup> -POB-Gua | O <sup>2</sup> -POB-Thd | Total POB DNA phosphate adducts | Py-Py-dI | O <sup>6</sup> -HPB-dAdo |          |
| 10 ppm (S)-NNN  | 20 weeks      | Liver                    | 40 ± 13                                                                       | -                        | 70 ± 8                  | 300 ± 32                |                                 |          |                          | [13, 14] |
|                 |               | Lung                     | 30 ± 6                                                                        | -                        | 50 ± 6                  | 230 ± 24                |                                 |          |                          |          |
|                 |               | Esophagus                | 230 ± 39                                                                      | -                        | 360 ± 71                | 420 ± 4                 |                                 |          |                          |          |
|                 |               | Nasal olfactory mucosa   | ND                                                                            | ND                       | 423 ± 623               | 1990 ± 2860             |                                 |          |                          |          |
|                 |               | Nasal respiratory mucosa | 14.4 ± 24.9                                                                   | ND                       | 591 ± 95                | 2270 ± 130              |                                 |          |                          |          |
|                 |               | Oral mucosa              | ND                                                                            | ND                       | 198 ± 159               | 277 ± 225               |                                 |          |                          |          |
| 10 ppm (R)-NNN  | 20 weeks      | Liver                    | 0                                                                             | -                        | 0                       | 40 ± 4                  |                                 |          |                          |          |
|                 |               | Lung                     | 80 ± 21                                                                       | -                        | 100 ± 11                | 470 ± 20                |                                 |          |                          |          |
|                 |               | Esophagus                | 30 ± 8                                                                        | -                        | 140 ± 41                | 90 ± 12                 |                                 |          |                          |          |
|                 |               | Nasal olfactory mucosa   | 9.0 ± 7.8                                                                     | ND                       | 200 ± 48                | 1200 ± 240              |                                 |          |                          |          |
|                 |               | Nasal respiratory mucosa | 53.2 ± 48.4                                                                   | 4.1 ± 7.1                | 996 ± 292               | 4620 ± 1170             |                                 |          |                          |          |
|                 |               | Oral mucosa              | ND                                                                            | ND                       | 49.4 ± 42.8             | 89.7 ± 11.5             |                                 |          |                          |          |
| 14 ppm (S)-NNN  | 10 weeks      | Liver                    | -                                                                             | -                        | 225 ± 22                | 503 ± 80                | 340 ± 59                        |          |                          | [15, 16] |
|                 |               | Lung                     | -                                                                             | -                        | 97 ± 3                  | 230 ± 7                 | -                               |          |                          |          |
|                 |               | Esophagus                | -                                                                             | < LOD                    | 1270 ± 310              | 756 ± 125               | -                               |          |                          |          |
|                 |               | Nasal olfactory mucosa   | -                                                                             | -                        | 100 ± 4                 | 331 ± 1                 | 150 ± 48                        |          |                          |          |
|                 |               | Nasal respiratory mucosa | -                                                                             | < LOD                    | 1303 ± 25               | 5419 ± 358              | 1740 ± 206                      |          |                          |          |
|                 |               | Oral mucosa              | ND                                                                            | ND                       | 271 ± 27                | 321 ± 49                | 260 ± 60                        |          |                          |          |
|                 | 30 weeks      | Liver                    | -                                                                             | -                        | 156 ± 12                | 533 ± 60                | 410 ± 84                        |          |                          |          |
|                 |               | Lung                     | -                                                                             | -                        | 85 ± 6                  | 265 ± 11                | -                               |          |                          |          |
|                 |               | Esophagus                | -                                                                             | < LOD                    | 1357 ± 135              | 1083 ± 64               | 3910 ± 715                      |          |                          |          |
|                 |               | Nasal olfactory mucosa   | -                                                                             | -                        | 114 ± 1                 | 474 ± 27                | 170 ± 41                        |          |                          |          |
|                 |               | Nasal respiratory mucosa | -                                                                             | < LOD                    | 1124 ± 6                | 5676 ± 654              | 1720 ± 156                      |          |                          |          |
|                 |               | Oral mucosa              | ND                                                                            | ND                       | 341 ± 31                | 408 ± 17                | 200 ± 30                        |          |                          |          |
|                 | 50 weeks      | Liver                    | -                                                                             | -                        | 90 ± 13                 | 374 ± 46                | 190 ± 38                        |          |                          |          |
|                 |               | Lung                     | -                                                                             | -                        | 64 ± 6                  | 224 ± 13                | -                               |          |                          |          |
|                 |               | Esophagus                | -                                                                             | < LOD                    | 1384 ± 226              | 1166 ± 231              | 5400 ± 317                      |          |                          |          |
|                 |               | Nasal olfactory mucosa   | -                                                                             | -                        | 125 ± 3                 | 475 ± 19                | 150 ± 7                         |          |                          |          |
|                 |               | Nasal respiratory mucosa | -                                                                             | < LOD                    | 1019 ± 107              | 5839 ± 709              | 2160 ± 495                      |          |                          |          |

| Exposure amount | Exposure time | Target tissue            | DNA base and phosphate adducts (fmol/mg DNA) formed by NNN or its enantiomers |                          |                         |                         |                                 |          |                          | Ref. |
|-----------------|---------------|--------------------------|-------------------------------------------------------------------------------|--------------------------|-------------------------|-------------------------|---------------------------------|----------|--------------------------|------|
|                 |               |                          | O <sup>2</sup> -POB-Cyt                                                       | O <sup>6</sup> -POB-dGuo | N <sup>7</sup> -POB-Gua | O <sup>2</sup> -POB-Thd | Total POB DNA phosphate adducts | Py-Py-dI | O <sup>6</sup> -HPB-dAdo |      |
|                 | 70 weeks      | Oral mucosa              | ND                                                                            | ND                       | 393 ± 37                | 458 ± 37                | 120 ± 27                        |          |                          |      |
|                 |               | Liver                    | -                                                                             | -                        | 148 ± 50                | 478 ± 85                | 200 ± 50                        |          |                          |      |
|                 |               | Lung                     | -                                                                             | -                        | 63 ± 8                  | 198 ± 9                 | -                               |          |                          |      |
|                 |               | Esophagus                | -                                                                             | < LOD                    | 1965 ± 610              | 1689 ± 450              | 4970                            |          |                          |      |
|                 |               | Nasal olfactory mucosa   | -                                                                             | -                        | 162 ± 5                 | 553 ± 74                | 250 ± 87                        |          |                          |      |
|                 |               | Nasal respiratory mucosa | -                                                                             | < LOD                    | 1142 ± 189              | 6941 ± 1299             | 1910 ± 198                      |          |                          |      |
|                 |               | Oral mucosa              | ND                                                                            | ND                       | 387 ± 74                | 534 ± 162               | 290 ± 156                       |          |                          |      |
| 14 ppm (R)-NNN  | 10 weeks      | Liver                    | -                                                                             | -                        | 34 ± 8                  | 86 ± 9                  | < LOD                           |          |                          |      |
|                 |               | Lung                     | -                                                                             | -                        | 191 ± 11                | 514 ± 21                | -                               |          |                          |      |
|                 |               | Esophagus                | -                                                                             | -                        | 513 ± 54                | 223 ± 3                 | 1400 ± 229                      |          |                          |      |
|                 |               | Nasal olfactory mucosa   | -                                                                             | -                        | 332 ± 3                 | 1367 ± 130              | 340 ± 74                        |          |                          |      |
|                 |               | Nasal respiratory mucosa | -                                                                             | < LOD                    | 745 ± 66                | 2504 ± 177              | 2830 ± 355                      |          |                          |      |
|                 |               | Oral mucosa              | -                                                                             | -                        | 108 ± 0                 | 76 ± 4                  | 40 ± 10                         |          |                          |      |
|                 | 30 weeks      | Liver                    | -                                                                             | -                        | 36 ± 25                 | 77 ± 7                  | < LOD                           |          |                          |      |
|                 |               | Lung                     | -                                                                             | -                        | 167 ± 18                | 591 ± 79                | -                               |          |                          |      |
|                 |               | Esophagus                | -                                                                             | -                        | 515 ± 119               | 206 ± 1                 | 2110 ± 1270                     |          |                          |      |
|                 |               | Nasal olfactory mucosa   | -                                                                             | -                        | 318 ± 16                | 1567 ± 43               | 670 ± 121                       |          |                          |      |
|                 |               | Nasal respiratory mucosa | -                                                                             | < LOD                    | 805 ± 95                | 3259 ± 222              | 3550 ± 720                      |          |                          |      |
|                 |               | Oral mucosa              | -                                                                             | -                        | 124 ± 3                 | 88 ± 5                  | 60 ± 54                         |          |                          |      |
|                 | 50 weeks      | Liver                    | -                                                                             | -                        | 17 ± 3                  | 69 ± 10                 | < LOD                           |          |                          |      |
|                 |               | Lung                     | -                                                                             | -                        | 144 ± 7                 | 574 ± 49                | -                               |          |                          |      |
|                 |               | Esophagus                | -                                                                             | -                        | 772 ± 208               | 176 ± 25                | 970 ± 211                       |          |                          |      |
|                 |               | Nasal olfactory mucosa   | -                                                                             | -                        | 314 ± 7                 | 1532 ± 58               | 520 ± 121                       |          |                          |      |
|                 |               | Nasal respiratory mucosa | -                                                                             | < LOD                    | 719 ± 100               | 3000 ± 706              | 2100 ± 327                      |          |                          |      |
|                 |               | Oral mucosa              | -                                                                             | -                        | 118 ± 8                 | 90 ± 7                  | 30 ± 15                         |          |                          |      |
|                 | 70 weeks      | Liver                    | -                                                                             | -                        | 18 ± 2                  | 64 ± 11                 | < LOD                           |          |                          |      |
|                 |               | Lung                     | -                                                                             | -                        | 114 ± 4                 | 454 ± 36                | -                               |          |                          |      |
|                 |               | Esophagus                | -                                                                             | -                        | 481 ± 152               | 221 ± 51                | 990 ± 246                       |          |                          |      |
|                 |               | Nasal olfactory mucosa   | -                                                                             | -                        | 359 ± 63                | 1804 ± 316              | 520 ± 151                       |          |                          |      |
|                 |               | Nasal respiratory mucosa | -                                                                             | < LOD                    | 763 ± 137               | 2955 ± 686              | 3680 ± 934                      |          |                          |      |
|                 |               | Oral mucosa              | -                                                                             | -                        | 170 ± 6                 | 159 ± 2                 | 70 ± 48                         |          |                          |      |
| 50 ppm (S)-NNN  | 3 weeks       | Liver                    | ND                                                                            | ND                       | 26 ± 4                  | 110 ± 5                 |                                 |          |                          | [17] |

| Exposure amount | Exposure time | Target tissue            | DNA base and phosphate adducts (fmol/mg DNA) formed by NNN or its enantiomers |                          |                         |                         |                                 |          |                          | Ref. |
|-----------------|---------------|--------------------------|-------------------------------------------------------------------------------|--------------------------|-------------------------|-------------------------|---------------------------------|----------|--------------------------|------|
|                 |               |                          | O <sup>2</sup> -POB-Cyt                                                       | O <sup>6</sup> -POB-dGuo | N <sup>7</sup> -POB-Gua | O <sup>2</sup> -POB-Thd | Total POB DNA phosphate adducts | Py-Py-dI | O <sup>6</sup> -HPB-dAdo |      |
|                 |               | Lung                     | 4.7 ± 0.3                                                                     | ND                       | 46 ± 8                  | 118 ± 9                 |                                 |          |                          |      |
|                 |               | Esophagus                | 74                                                                            | 4.5 ± 1.7                | 309 ± 31                | 287 ± 32                |                                 |          |                          |      |
|                 |               | Nasal olfactory mucosa   | 4 ± 1                                                                         | ND                       | 52 ± 10                 | 140 ± 14                |                                 |          |                          |      |
|                 |               | Nasal respiratory mucosa | 22 ± 3                                                                        | ND                       | 283 ± 39                | 759 ± 34                |                                 |          |                          |      |
|                 |               | Oral mucosa              | 16                                                                            | 2.2 ± 0.7                | 106 ± 28                | 138 ± 29                |                                 |          |                          |      |
| 100 ppm (S)-NNN | 3 weeks       | Liver                    | ND                                                                            | ND                       | 57 ± 6                  | 239 ± 35                |                                 |          |                          |      |
|                 |               | Lung                     | 6 ± 1                                                                         | ND                       | 84 ± 4                  | 208 ± 14                |                                 |          |                          |      |
|                 |               | Esophagus                | 57                                                                            | 8.5 ± 1.3                | 487 ± 71                | 474 ± 82                |                                 |          |                          |      |
|                 |               | Nasal olfactory mucosa   | 8 ± 1                                                                         | ND                       | 97 ± 13                 | 264 ± 3                 |                                 |          |                          |      |
|                 |               | Nasal respiratory mucosa | 51 ± 12                                                                       | 9 ± 1                    | 678 ± 186               | 1710 ± 330              |                                 |          |                          |      |
|                 |               | Oral mucosa              | 21                                                                            | 3.3 ± 0.6                | 162 ± 39                | 200 ± 47                |                                 |          |                          |      |
| 500 ppm (S)-NNN | 3 weeks       | Liver                    | 9                                                                             | ND                       | 108 ± 14                | 437 ± 26                |                                 |          |                          |      |
|                 |               | Lung                     | 8 ± 1                                                                         | ND                       | 141 ± 17                | 332 ± 32                |                                 |          |                          |      |
|                 |               | Esophagus                | 135 ± 27                                                                      | 16.7 ± 4.9               | 1110 ± 160              | 1050 ± 110              |                                 |          |                          |      |
|                 |               | Nasal olfactory mucosa   | 14 ± 6                                                                        | 3                        | 165 ± 44                | 453 ± 85                |                                 |          |                          |      |
|                 |               | Nasal respiratory mucosa | 87 ± 18                                                                       | 23 ± 4                   | 1230 ± 360              | 3110 ± 520              |                                 |          |                          |      |
|                 |               | Oral mucosa              | 32                                                                            | 5.1 ± 0.8                | 257 ± 28                | 307 ± 34                |                                 |          |                          |      |
| 50 ppm (R)-NNN  | 3 weeks       | Liver                    | ND                                                                            | ND                       | 4 ± 1                   | 15 ± 2                  |                                 |          |                          |      |
|                 |               | Lung                     | 6 ± 1                                                                         | ND                       | 107 ± 29                | 302 ± 49                |                                 |          |                          |      |
|                 |               | Esophagus                | ND                                                                            | 2.4 ± 1.0                | 129 ± 16                | 66 ± 1                  |                                 |          |                          |      |
|                 |               | Nasal olfactory mucosa   | 14 ± 3                                                                        | ND                       | 135 ± 41                | 443 ± 55                |                                 |          |                          |      |
|                 |               | Nasal respiratory mucosa | 38 ± 6                                                                        | 8                        | 489 ± 172               | 1510 ± 270              |                                 |          |                          |      |
|                 |               | Oral mucosa              | ND                                                                            | 0.8 ± 0.3                | 39 ± 13                 | 24 ± 3                  |                                 |          |                          |      |
| 100 ppm (R)-NNN | 3 weeks       | Liver                    | ND                                                                            | ND                       | 10 ± 1                  | 34 ± 5                  |                                 |          |                          |      |
|                 |               | Lung                     | 14 ± 3                                                                        | ND                       | 182 ± 11                | 563 ± 69                |                                 |          |                          |      |
|                 |               | Esophagus                | ND                                                                            | 5.5 ± 1.2                | 212 ± 35                | 119 ± 18                |                                 |          |                          |      |
|                 |               | Nasal olfactory mucosa   | 31 ± 12                                                                       | 4 ± 1                    | 325 ± 135               | 1110 ± 310              |                                 |          |                          |      |
|                 |               | Nasal respiratory mucosa | 95 ± 26                                                                       | 22 ± 3                   | 1090 ± 430              | 3440 ± 860              |                                 |          |                          |      |
|                 |               | Oral mucosa              | 7                                                                             | 2.0 ± 0.6                | 69 ± 15                 | 50 ± 11                 |                                 |          |                          |      |
| 500 ppm (R)-NNN | 3 weeks       | Liver                    | ND                                                                            | ND                       | 21 ± 14                 | 64 ± 12                 |                                 |          |                          |      |
|                 |               | Lung                     | 29 ± 5                                                                        | ND                       | 366 ± 26                | 1130 ± 80               |                                 |          |                          |      |
|                 |               | Esophagus                | 48                                                                            | 14.7 ± 3.3               | 400 ± 40                | 256 ± 43                |                                 |          |                          |      |

| Exposure amount     | Exposure time | Target tissue            | DNA base and phosphate adducts (fmol/mg DNA) formed by NNN or its enantiomers |                          |                         |                         |                                 |                        |                          | Ref.    |
|---------------------|---------------|--------------------------|-------------------------------------------------------------------------------|--------------------------|-------------------------|-------------------------|---------------------------------|------------------------|--------------------------|---------|
|                     |               |                          | O <sup>2</sup> -POB-Cyt                                                       | O <sup>6</sup> -POB-dGuo | N <sup>7</sup> -POB-Gua | O <sup>2</sup> -POB-Thd | Total POB DNA phosphate adducts | Py-Py-dI               | O <sup>6</sup> -HPB-dAdo |         |
|                     |               | Nasal olfactory mucosa   | 51 ± 18                                                                       | 9 ± 1                    | 615 ± 158               | 2150 ± 210              |                                 |                        |                          | [17-19] |
|                     |               | Nasal respiratory mucosa | 192 ± 41                                                                      | 31 ± 5                   | 2090 ± 790              | 6410 ± 1540             |                                 |                        |                          |         |
|                     |               | Oral mucosa              | 10                                                                            | 3.9 ± 1.0                | 104 ± 18                | 104 ± 28                |                                 |                        |                          |         |
| 50 ppm racemic NNN  | 3 weeks       | Liver                    | ND                                                                            | ND                       | 30 ± 2                  | 132 ± 6                 |                                 | 56 ± 14 fmol/μmol dGuo | 74 ± 4 fmol/μmol dGuo    |         |
|                     |               | Lung                     | 11 ± 2                                                                        | ND                       | 147 ± 42                | 420 ± 74                |                                 | 580 ± 41               | 110 ± 18                 |         |
|                     |               | Esophagus                | 62                                                                            | 11.2 ± 1.6               | 417 ± 65                | 354 ± 23                |                                 | 129 ± 13               |                          |         |
|                     |               | Nasal olfactory mucosa   | 15 ± 3                                                                        | 3                        | 178 ± 33                | 590 ± 78                |                                 | 458 ± 37               |                          |         |
|                     |               | Nasal respiratory mucosa | 71 ± 9                                                                        | 16 ± 3                   | 873 ± 103               | 2500 ± 180              |                                 | 869 ± 14               |                          |         |
|                     |               | Oral mucosa              | 14                                                                            | 3.5 ± 1.0                | 116 ± 31                | 134 ± 23                |                                 | 31 ± 3.8               |                          |         |
| 100 ppm racemic NNN | 3 weeks       | Liver                    | ND                                                                            | ND                       | 74 ± 20                 | 268 ± 14                |                                 | 157 ± 42               | 84 ± 20                  |         |
|                     |               | Lung                     | 18 ± 4                                                                        | ND                       | 269 ± 36                | 748 ± 90                |                                 | 1045 ± 69              | 176 ± 34                 |         |
|                     |               | Esophagus                | 90 ± 7                                                                        | 18.4 ± 3.3               | 679 ± 61                | 593 ± 98                |                                 | 158 ± 26               |                          |         |
|                     |               | Nasal olfactory mucosa   | 35 ± 13                                                                       | 6 ± 2                    | 404 ± 155               | 1250 ± 330              |                                 | 957 ± 7.8              |                          |         |
|                     |               | Nasal respiratory mucosa | 144 ± 14                                                                      | 24 ± 6                   | 1660 ± 300              | 5090 ± 500              |                                 | 1451 ± 260             |                          |         |
|                     |               | Oral mucosa              | 24 ± 6                                                                        | 5.2 ± 0.1                | 195 ± 22                | 225 ± 41                |                                 | 60 ± 1.6               |                          |         |
| 500 ppm racemic NNN | 3 weeks       | Liver                    | 12                                                                            | ND                       | 111 ± 19                | 472 ± 53                |                                 | 412 ± 53               | 233 ± 84                 |         |
|                     |               | Lung                     | 21 ± 4                                                                        | ND                       | 335 ± 28                | 985 ± 113               |                                 | 2018 ± 200             | 328 ± 44                 |         |
|                     |               | Esophagus                | 172 ± 51                                                                      | 26.4 ± 10.8              | 1300 ± 150              | 1180 ± 60               |                                 | 232 ± 89               |                          |         |
|                     |               | Nasal olfactory mucosa   | 68 ± 21                                                                       | 12 ± 4                   | 794 ± 204               | 2420 ± 750              |                                 | 2458 ± 190             |                          |         |
|                     |               | Nasal respiratory mucosa | 292 ± 43                                                                      | 41 ± 3                   | 3240 ± 500              | 9420 ± 1300             |                                 | 2015 ± 80              |                          |         |
|                     |               | Oral mucosa              | 33 ± 3                                                                        | 8.6 ± 1.5                | 269 ± 41                | 295 ± 64                |                                 | 100 ± 7.1              |                          |         |

## References

1. Urban, A.M.; Upadhyaya, P.; Cao, Q.; Peterson, L.A., Formation and repair of pyridyloxobutyl DNA adducts and their relationship to tumor yield in A/J mice. *Chem. Res. Toxicol.* **2012**, 25, (10), 2167-78.
2. Lao, Y.; Villalta, P.W.; Sturla, S.J.; Wang, M.; Hecht, S.S., Quantitation of pyridyloxobutyl DNA adducts of tobacco-specific nitrosamines in rat tissue DNA by high-performance liquid chromatography-electrospray ionization-tandem mass spectrometry. *Chem. Res. Toxicol.* **2006**, 19, (5), 674-82.
3. Lao, Y.; Yu, N.; Kassie, F.; Villalta, P.W.; Hecht, S.S., Formation and accumulation of pyridyloxobutyl DNA adducts in F344 rats chronically treated with 4-(methylnitrosamino)-1-(3-pyridyl)-1-butanone and enantiomers of its metabolite, 4-(methylnitrosamino)-1-(3-pyridyl)-1-butanol. *Chem. Res. Toxicol.* **2007**, 20, (2), 235-45.
4. Zhang, S.; Wang, M.; Villalta, P.W.; Lindgren, B.R.; Upadhyaya, P.; Lao, Y.; Hecht, S.S., Analysis of pyridyloxobutyl and pyridylhydroxybutyl DNA adducts in extrahepatic tissues of F344 rats treated chronically with 4-(methylnitrosamino)-1-(3-pyridyl)-1-butanone and enantiomers of 4-(methylnitrosamino)-1-(3-pyridyl)-1-butanol. *Chem. Res. Toxicol.* **2009**, 22, (5), 926-36.
5. Upadhyaya, P.; Kalscheuer, S.; Hochalter, J.B.; Villalta, P.W.; Hecht, S.S., Quantitation of pyridylhydroxybutyl-DNA adducts in liver and lung of F-344 rats treated with 4-(methylnitrosamino)-1-(3-pyridyl)-1-butanone and enantiomers of its metabolite 4-(methylnitrosamino)-1-(3-pyridyl)-1-butanol. *Chem. Res. Toxicol.* **2008**, 21, (7), 1468-76.
6. Upadhyaya, P.; Lindgren, B.R.; Hecht, S.S., Comparative levels of *O*<sup>6</sup>-methylguanine, pyridyloxobutyl-, and pyridylhydroxybutyl-DNA adducts in lung and liver of rats treated chronically with the tobacco-specific carcinogen 4-(methylnitrosamino)-1-(3-pyridyl)-1-butanone. *Drug Metab. Dispos.* **2009**, 37, (6), 1147-51.
7. Carlson, E.S.; Upadhyaya, P.; Villalta, P.W.; Ma, B.; Hecht, S.S., Analysis and identification of 2'-deoxyadenosine-derived adducts in lung and liver DNA of F-344 rats treated with the tobacco-specific carcinogen 4-(methylnitrosamino)-1-(3-pyridyl)-1-butanone and enantiomers of its metabolite 4-(methylnitrosamino)-1-(3-pyridyl)-1-butanol. *Chem. Res. Toxicol.* **2018**, 31, (5), 358-370.
8. Ma, B.; Villalta, P.W.; Zarth, A.T.; Kotandeniya, D.; Upadhyaya, P.; Stepanov, I.; Hecht, S.S., Comprehensive high-resolution mass spectrometric analysis of DNA phosphate adducts formed by the tobacco-specific lung carcinogen 4-(methylnitrosamino)-1-(3-pyridyl)-1-butanone. *Chem. Res. Toxicol.* **2015**, 28, (11), 2151-9.
9. Ma, B.; Zarth, A.T.; Carlson, E.S.; Villalta, P.W.; Upadhyaya, P.; Stepanov, I.; Hecht, S.S., Identification of more than 100 structurally unique DNA-phosphate adducts formed during rat lung carcinogenesis by the tobacco-specific nitrosamine 4-(methylnitrosamino)-1-(3-pyridyl)-1-butanone. *Carcinogenesis* **2018**, 39, (2), 232-241.
10. Balbo, S.; Johnson, C.S.; Kovi, R.C.; James-Yi, S.A.; O'Sullivan, M.G.; Wang, M.; Le, C.T.; Khariwala, S.S.; Upadhyaya, P.; Hecht, S.S., Carcinogenicity and DNA adduct formation of 4-(methylnitrosamino)-1-(3-pyridyl)-1-butanone and enantiomers of its metabolite 4-(methylnitrosamino)-1-(3-pyridyl)-1-butanol in F-344 rats. *Carcinogenesis* **2014**, 35, (12), 2798-806.
11. Ma, B.; Zarth, A.T.; Carlson, E.S.; Villalta, P.W.; Stepanov, I.; Hecht, S.S., Pyridylhydroxybutyl and pyridyloxobutyl DNA phosphate adduct formation in rats treated chronically with enantiomers of the tobacco-specific nitrosamine metabolite 4-(methylnitrosamino)-1-(3-pyridyl)-1-butanol. *Mutagenesis* **2017**, 32, (6), 561-570.
12. Ma, B.; Zarth, A.T.; Carlson, E.S.; Villalta, P.W.; Upadhyaya, P.; Stepanov, I.; Hecht, S.S., Methyl DNA phosphate adduct formation in rats treated chronically with 4-(methylnitrosamino)-1-(3-pyridyl)-1-butanone and enantiomers of its metabolite 4-(methylnitrosamino)-1-(3-pyridyl)-1-butanol. *Chem. Res. Toxicol.* **2018**, 31, (1), 48-57.
13. Lao, Y.; Yu, N.; Kassie, F.; Villalta, P.W.; Hecht, S.S., Analysis of pyridyloxobutyl DNA adducts in F344 rats chronically treated with (*R*)- and (*S*)-*N'*-nitrosonornicotine. *Chem. Res. Toxicol.* **2007**, 20, (2), 246-56.
14. Zhang, S.; Wang, M.; Villalta, P.W.; Lindgren, B.R.; Lao, Y.; Hecht, S.S., Quantitation of pyridyloxobutyl DNA adducts in nasal and oral mucosa of rats treated chronically with enantiomers of *N'*-nitrosonornicotine. *Chem. Res. Toxicol.* **2009**, 22, (5), 949-56.

15. Zhao, L.; Balbo, S.; Wang, M.; Upadhyaya, P.; Khariwala, S.S.; Villalta, P.W.; Hecht, S.S., Quantitation of pyridyloxobutyl-DNA adducts in tissues of rats treated chronically with (*R*)- or (*S*)-*N'*-nitrosonornicotine (NNN) in a carcinogenicity study. *Chem. Res. Toxicol.* **2013**, 26, (10), 1526-35.
16. Li, Y.; Ma, B.; Cao, Q.; Balbo, S.; Zhao, L.; Upadhyaya, P.; Hecht, S.S., Mass spectrometric quantitation of pyridyloxobutyl DNA phosphate adducts in rats chronically treated with *N'*-nitrosonornicotine. *Chem. Res. Toxicol.* **2019**, 32, (4), 773-783.
17. Yang, J.; Villalta, P.W.; Upadhyaya, P.; Hecht, S.S., Analysis of *O*<sup>6</sup>-[4-(3-pyridyl)-4-oxobut-1-yl]-2'-deoxyguanosine and other DNA adducts in rats treated with enantiomeric or racemic *N'*-ntrosonornicotine. *Chem. Res. Toxicol.* **2016**, 29, (1), 87-95.
18. Zarth, A.T.; Upadhyaya, P.; Yang, J.; Hecht, S.S., DNA adduct formation from metabolic 5'-hydroxylation of the tobacco-specific carcinogen *N'*-nitrosonornicotine in human enzyme systems and in rats. *Chem. Res. Toxicol.* **2016**, 29, (3), 380-9.
19. Li, Y.; Hecht, S.S., Identification of an *N'*-nitrosonornicotine-specific deoxyadenosine adduct in rat liver and lung DNA. *Chem. Res. Toxicol.* **2021**, 34, (4), 992-1003.
